# Supplementary material for: Substantial π-aromaticity in the anionic heavy-metal cluster [Th@Bi12]4−
Source: Springer Nature journal article supplement (doi:10.1038/s41557-020-00592-z), 2020-12-07
Supplement: 41557_2020_592_MOESM2_ESM.mol [file 41557_2020_592_MOESM2_ESM.mol]

nchem.20020368C-comp1.mol
  ChemDraw10222012522D

 32 43  0  0  0  0  0  0  0  0999 V2000
   -0.1724    1.4009    0.0000 Cl  0  0  0  0  0  0  0  0  0  0  0  0
   -0.1509    0.4040    0.0000 Th  0  0  0  0  0  0  0  0  0  0  0  0
   -0.2053   -2.1715    0.0000 C   0  0  0  0  0  0  0  0  0  0  0  0
    0.1158   -2.9315    0.0000 C   0  0  0  0  0  0  0  0  0  0  0  0
   -1.0088   -1.9847    0.0000 C   0  0  0  0  0  0  0  0  0  0  0  0
   -1.6324   -2.5249    0.0000 C   0  0  0  0  0  0  0  0  0  0  0  0
    0.2208   -1.4651    0.0000 C   0  0  0  0  0  0  0  0  0  0  0  0
    1.0458   -1.4651    0.0000 H   0  0  0  0  0  0  0  0  0  0  0  0
   -0.3195   -0.8415    0.0000 C   0  0  0  0  0  0  0  0  0  0  0  0
   -0.7320   -0.1271    0.0000 C   0  0  0  0  0  0  0  0  0  0  0  0
   -1.0794   -1.1627    0.0000 C   0  0  0  0  0  0  0  0  0  0  0  0
   -1.7939   -0.7502    0.0000 C   0  0  0  0  0  0  0  0  0  0  0  0
    2.7218    1.0200    0.0000 C   0  0  0  0  0  0  0  0  0  0  0  0
    3.3798    0.5224    0.0000 C   0  0  0  0  0  0  0  0  0  0  0  0
    1.9324    0.7801    0.0000 C   0  0  0  0  0  0  0  0  0  0  0  0
    1.6626    0.0004    0.0000 C   0  0  0  0  0  0  0  0  0  0  0  0
    2.7375    1.8448    0.0000 C   0  0  0  0  0  0  0  0  0  0  0  0
    3.4520    2.2573    0.0000 H   0  0  0  0  0  0  0  0  0  0  0  0
    1.9579    2.1147    0.0000 C   0  0  0  0  0  0  0  0  0  0  0  0
    1.7179    2.9040    0.0000 C   0  0  0  0  0  0  0  0  0  0  0  0
    1.4603    1.4566    0.0000 C   0  0  0  0  0  0  0  0  0  0  0  0
    0.7458    1.8691    0.0000 C   0  0  0  0  0  0  0  0  0  0  0  0
   -2.6012    2.0541    0.0000 C   0  0  0  0  0  0  0  0  0  0  0  0
   -3.2106    2.6101    0.0000 C   0  0  0  0  0  0  0  0  0  0  0  0
   -1.7878    2.1923    0.0000 C   0  0  0  0  0  0  0  0  0  0  0  0
   -1.4215    2.9315    0.0000 H   0  0  0  0  0  0  0  0  0  0  0  0
   -1.4051    1.4614    0.0000 C   0  0  0  0  0  0  0  0  0  0  0  0
   -0.8491    2.0709    0.0000 C   0  0  0  0  0  0  0  0  0  0  0  0
   -1.9819    0.8716    0.0000 C   0  0  0  0  0  0  0  0  0  0  0  0
   -1.9441    0.0474    0.0000 C   0  0  0  0  0  0  0  0  0  0  0  0
   -2.7211    1.2379    0.0000 C   0  0  0  0  0  0  0  0  0  0  0  0
   -3.4520    0.8551    0.0000 C   0  0  0  0  0  0  0  0  0  0  0  0
  1  2  1  0      
  2  3  1  0      
  3  4  1  0      
  3  5  1  0      
  5  6  1  0      
  3  7  1  0      
  2  7  1  0      
  7  8  1  0      
  7  9  1  0      
  2  9  1  0      
  9 10  1  0      
  9 11  1  0      
  2 11  1  0      
  5 11  1  0      
 11 12  1  0      
  2 13  1  0      
 13 14  1  0      
 13 15  1  0      
 15 16  1  0      
 13 17  1  0      
  2 17  1  0      
 17 18  1  0      
 17 19  1  0      
  2 19  1  0      
 19 20  1  0      
 19 21  1  0      
  2 21  1  0      
 15 21  1  0      
 21 22  1  0      
  2 23  1  0      
 23 24  1  0      
 23 25  1  0      
  2 25  1  0      
 25 26  1  0      
 25 27  1  0      
  2 27  1  0      
 27 28  1  0      
 27 29  1  0      
  2 29  1  0      
 29 30  1  0      
 29 31  1  0      
 23 31  1  0      
 31 32  1  0      
M  END
