# Supplementary material for: Substantial π-aromaticity in the anionic heavy-metal cluster [Th@Bi12]4−
Source: Springer Nature journal article supplement (doi:10.1038/s41557-020-00592-z), 2020-12-07
Supplement: 41557_2020_592_MOESM11_ESM.mol [file 41557_2020_592_MOESM11_ESM.mol]

nchem.20020368C-comp4.mol
  ChemDraw10222013073D

102145  0  0  0  0  0  0  0  0999 V2000
  -11.0520   -1.4387    3.9726 C   0  0  0  0  0  0  0  0  0  0  0  0
  -11.7115   -2.2002    3.9726 C   0  0  0  0  0  0  0  0  0  0  0  0
  -11.7115   -3.7231    3.9726 O   0  0  0  0  0  0  0  0  0  0  0  0
  -12.3709   -4.4846    3.9726 C   0  0  0  0  0  0  0  0  0  0  0  0
  -12.3709   -6.0076    3.9726 C   0  0  0  0  0  0  0  0  0  0  0  0
  -11.7115   -6.7691    3.9726 O   0  0  0  0  0  0  0  0  0  0  0  0
  -11.7115   -8.2920    3.9726 C   0  0  0  0  0  0  0  0  0  0  0  0
  -11.0520   -9.0535    3.9726 C   0  0  0  0  0  0  0  0  0  0  0  0
  -10.3925   -8.2920    3.9726 N   0  0  0  0  0  0  0  0  0  0  0  0
  -11.7115   -9.0535    3.9726 C   0  0  0  0  0  0  0  0  0  0  0  0
  -13.0304   -8.2920    3.9726 C   0  0  0  0  0  0  0  0  0  0  0  0
  -13.0304   -6.7691    3.9726 O   0  0  0  0  0  0  0  0  0  0  0  0
  -14.3493   -6.0076    3.9726 C   0  0  0  0  0  0  0  0  0  0  0  0
  -14.3493   -4.4846    3.9726 C   0  0  0  0  0  0  0  0  0  0  0  0
  -13.0304   -3.7231    3.9726 O   0  0  0  0  0  0  0  0  0  0  0  0
  -13.0304   -2.2002    3.9726 C   0  0  0  0  0  0  0  0  0  0  0  0
  -11.7115   -1.4387    3.9726 C   0  0  0  0  0  0  0  0  0  0  0  0
  -10.3925   -2.2002    3.9726 N   0  0  0  0  0  0  0  0  0  0  0  0
   -9.0736   -1.4387    3.9726 C   0  0  0  0  0  0  0  0  0  0  0  0
   -7.7547   -2.2002    3.9726 C   0  0  0  0  0  0  0  0  0  0  0  0
   -7.7547   -3.7231    3.9726 O   0  0  0  0  0  0  0  0  0  0  0  0
   -6.4357   -4.4846    3.9726 C   0  0  0  0  0  0  0  0  0  0  0  0
   -6.4357   -6.0076    3.9726 C   0  0  0  0  0  0  0  0  0  0  0  0
   -7.7547   -6.7691    3.9726 O   0  0  0  0  0  0  0  0  0  0  0  0
   -7.7547   -8.2920    3.9726 C   0  0  0  0  0  0  0  0  0  0  0  0
   -9.0736   -9.0535    3.9726 C   0  0  0  0  0  0  0  0  0  0  0  0
  -10.4004   -5.2964    3.9726 K   0  3  0  0  0  0  0  0  0  0  0  0
   -0.1041   -2.0111    3.9726 C   0  0  0  0  0  0  0  0  0  0  0  0
   -0.7635   -2.7726    3.9726 C   0  0  0  0  0  0  0  0  0  0  0  0
   -0.7635   -4.2955    3.9726 O   0  0  0  0  0  0  0  0  0  0  0  0
   -1.4229   -5.0570    3.9726 C   0  0  0  0  0  0  0  0  0  0  0  0
   -1.4229   -6.5800    3.9726 C   0  0  0  0  0  0  0  0  0  0  0  0
   -0.7635   -7.3415    3.9726 O   0  0  0  0  0  0  0  0  0  0  0  0
   -0.7635   -8.8644    3.9726 C   0  0  0  0  0  0  0  0  0  0  0  0
   -0.1041   -9.6259    3.9726 C   0  0  0  0  0  0  0  0  0  0  0  0
    0.5554   -8.8644    3.9726 N   0  0  0  0  0  0  0  0  0  0  0  0
   -0.7635   -9.6259    3.9726 C   0  0  0  0  0  0  0  0  0  0  0  0
   -2.0824   -8.8644    3.9726 C   0  0  0  0  0  0  0  0  0  0  0  0
   -2.0824   -7.3415    3.9726 O   0  0  0  0  0  0  0  0  0  0  0  0
   -3.4014   -6.5800    3.9726 C   0  0  0  0  0  0  0  0  0  0  0  0
   -3.4014   -5.0570    3.9726 C   0  0  0  0  0  0  0  0  0  0  0  0
   -2.0824   -4.2955    3.9726 O   0  0  0  0  0  0  0  0  0  0  0  0
   -2.0824   -2.7726    3.9726 C   0  0  0  0  0  0  0  0  0  0  0  0
   -0.7635   -2.0111    3.9726 C   0  0  0  0  0  0  0  0  0  0  0  0
    0.5554   -2.7726    3.9726 N   0  0  0  0  0  0  0  0  0  0  0  0
    1.8744   -2.0111    3.9726 C   0  0  0  0  0  0  0  0  0  0  0  0
    3.1933   -2.7726    3.9726 C   0  0  0  0  0  0  0  0  0  0  0  0
    3.1933   -4.2955    3.9726 O   0  0  0  0  0  0  0  0  0  0  0  0
    4.5122   -5.0570    3.9726 C   0  0  0  0  0  0  0  0  0  0  0  0
    4.5122   -6.5800    3.9726 C   0  0  0  0  0  0  0  0  0  0  0  0
    3.1933   -7.3415    3.9726 O   0  0  0  0  0  0  0  0  0  0  0  0
    3.1933   -8.8644    3.9726 C   0  0  0  0  0  0  0  0  0  0  0  0
    1.8744   -9.6259    3.9726 C   0  0  0  0  0  0  0  0  0  0  0  0
    0.5475   -5.8688    3.9726 K   0  3  0  0  0  0  0  0  0  0  0  0
    9.7331   -1.6938    3.9726 C   0  0  0  0  0  0  0  0  0  0  0  0
    9.0736   -2.4552    3.9726 C   0  0  0  0  0  0  0  0  0  0  0  0
    9.0736   -3.9782    3.9726 O   0  0  0  0  0  0  0  0  0  0  0  0
    8.4142   -4.7397    3.9726 C   0  0  0  0  0  0  0  0  0  0  0  0
    8.4142   -6.2626    3.9726 C   0  0  0  0  0  0  0  0  0  0  0  0
    9.0736   -7.0241    3.9726 O   0  0  0  0  0  0  0  0  0  0  0  0
    9.0736   -8.5471    3.9726 C   0  0  0  0  0  0  0  0  0  0  0  0
    9.7331   -9.3086    3.9726 C   0  0  0  0  0  0  0  0  0  0  0  0
   10.3925   -8.5471    3.9726 N   0  0  0  0  0  0  0  0  0  0  0  0
    9.0736   -9.3086    3.9726 C   0  0  0  0  0  0  0  0  0  0  0  0
    7.7547   -8.5471    3.9726 C   0  0  0  0  0  0  0  0  0  0  0  0
    7.7547   -7.0241    3.9726 O   0  0  0  0  0  0  0  0  0  0  0  0
    6.4357   -6.2626    3.9726 C   0  0  0  0  0  0  0  0  0  0  0  0
    6.4357   -4.7397    3.9726 C   0  0  0  0  0  0  0  0  0  0  0  0
    7.7547   -3.9782    3.9726 O   0  0  0  0  0  0  0  0  0  0  0  0
    7.7547   -2.4552    3.9726 C   0  0  0  0  0  0  0  0  0  0  0  0
    9.0736   -1.6938    3.9726 C   0  0  0  0  0  0  0  0  0  0  0  0
   10.3925   -2.4552    3.9726 N   0  0  0  0  0  0  0  0  0  0  0  0
   11.7115   -1.6938    3.9726 C   0  0  0  0  0  0  0  0  0  0  0  0
   13.0304   -2.4552    3.9726 C   0  0  0  0  0  0  0  0  0  0  0  0
   13.0304   -3.9782    3.9726 O   0  0  0  0  0  0  0  0  0  0  0  0
   14.3493   -4.7397    3.9726 C   0  0  0  0  0  0  0  0  0  0  0  0
   14.3493   -6.2626    3.9726 C   0  0  0  0  0  0  0  0  0  0  0  0
   13.0304   -7.0241    3.9726 O   0  0  0  0  0  0  0  0  0  0  0  0
   13.0304   -8.5471    3.9726 C   0  0  0  0  0  0  0  0  0  0  0  0
   11.7115   -9.3086    3.9726 C   0  0  0  0  0  0  0  0  0  0  0  0
   10.3846   -5.5515    3.9726 K   0  3  0  0  0  0  0  0  0  0  0  0
   -2.0818    6.0650   -0.0043 Th  0  7  0  0  0  0  0  0  0  0  0  0
    2.0224    6.2344   -0.6321 Bi  0  0  0  0  0  0  0  0  0  0  0  0
    0.7831    7.4839    2.5078 Bi  0  0  0  0  0  0  0  0  0  0  0  0
   -0.0034    8.6922   -2.3086 Bi  0  0  0  0  0  0  0  0  0  0  0  0
    0.4952    3.0227   -1.1884 Pb  0  0  0  0  0  0  0  0  0  0  0  0
   -2.2071    9.6259    0.9095 Bi  0  0  0  0  0  0  0  0  0  0  0  0
   -4.9949    8.3777   -1.6427 Bi  0  0  0  0  0  0  0  0  0  0  0  0
   -4.1875    7.1371    3.3027 Bi  0  0  0  0  0  0  0  0  0  0  0  0
   -1.6547    2.4394    1.7161 Bi  0  0  0  0  0  0  0  0  0  0  0  0
   -2.4639    3.6825   -3.2393 Bi  0  0  0  0  0  0  0  0  0  0  0  0
   -6.2002    5.8597    0.6167 Bi  0  0  0  0  0  0  0  0  0  0  0  0
   -2.7074    7.1439   -4.1122 Pb  0  0  0  0  0  0  0  0  0  0  0  0
   -4.6051    2.8234   -0.4056 Pb  0  0  0  0  0  0  0  0  0  0  0  0
   -1.3644    5.0805    4.1122 Pb  0  0  0  0  0  0  0  0  0  0  0  0
    5.2125    5.9416    3.6236 C   0  0  0  0  0  0  0  0  0  0  0  0
    5.2125    4.4186    3.6236 C   0  0  0  0  0  0  0  0  0  0  0  0
    6.5315    3.6571    3.6236 C   0  0  0  0  0  0  0  0  0  0  0  0
    7.8503    4.4186    3.6236 C   0  0  0  0  0  0  0  0  0  0  0  0
    7.8503    5.9416    3.6236 C   0  0  0  0  0  0  0  0  0  0  0  0
    6.5315    6.7031    3.6236 C   0  0  0  0  0  0  0  0  0  0  0  0
    6.5315    8.2260    3.6236 C   0  0  0  0  0  0  0  0  0  0  0  0
  1  2  1  0      
  2  3  1  0      
  3  4  1  0      
  4  5  1  0      
  5  6  1  0      
  6  7  1  0      
  7  8  1  0      
  8  9  1  0      
  9 10  1  0      
 10 11  1  0      
 11 12  1  0      
 12 13  1  0      
 13 14  1  0      
 14 15  1  0      
 15 16  1  0      
 16 17  1  0      
 17 18  1  0      
  1 18  1  0      
 18 19  1  0      
 19 20  1  0      
 20 21  1  0      
 21 22  1  0      
 22 23  1  0      
 23 24  1  0      
 24 25  1  0      
 25 26  1  0      
  9 26  1  0      
 27 18  1  0      
 27 21  1  0      
 27 24  1  0      
 27  9  1  0      
 27  3  1  0      
 27 15  1  0      
 27 12  1  0      
 27  6  1  0      
 28 29  1  0      
 29 30  1  0      
 30 31  1  0      
 31 32  1  0      
 32 33  1  0      
 33 34  1  0      
 34 35  1  0      
 35 36  1  0      
 36 37  1  0      
 37 38  1  0      
 38 39  1  0      
 39 40  1  0      
 40 41  1  0      
 41 42  1  0      
 42 43  1  0      
 43 44  1  0      
 44 45  1  0      
 28 45  1  0      
 45 46  1  0      
 46 47  1  0      
 47 48  1  0      
 48 49  1  0      
 49 50  1  0      
 50 51  1  0      
 51 52  1  0      
 52 53  1  0      
 36 53  1  0      
 54 45  1  0      
 54 48  1  0      
 54 51  1  0      
 54 36  1  0      
 54 30  1  0      
 54 42  1  0      
 54 39  1  0      
 54 33  1  0      
 55 56  1  0      
 56 57  1  0      
 57 58  1  0      
 58 59  1  0      
 59 60  1  0      
 60 61  1  0      
 61 62  1  0      
 62 63  1  0      
 63 64  1  0      
 64 65  1  0      
 65 66  1  0      
 66 67  1  0      
 67 68  1  0      
 68 69  1  0      
 69 70  1  0      
 70 71  1  0      
 71 72  1  0      
 55 72  1  0      
 72 73  1  0      
 73 74  1  0      
 74 75  1  0      
 75 76  1  0      
 76 77  1  0      
 77 78  1  0      
 78 79  1  0      
 79 80  1  0      
 63 80  1  0      
 81 72  1  0      
 81 75  1  0      
 81 78  1  0      
 81 63  1  0      
 81 57  1  0      
 81 69  1  0      
 81 66  1  0      
 81 60  1  0      
 83 82  1  0      
 84 82  1  0      
 82 85  1  0      
 82 86  1  0      
 82 87  1  0      
 82 88  1  0      
 89 82  1  0      
 90 82  1  0      
 82 91  1  0      
 92 82  1  0      
 82 93  1  0      
 82 94  1  0      
 83 84  1  0      
 83 85  1  0      
 83 86  1  0      
 84 87  1  0      
 84 95  1  0      
 86 91  1  0      
 86 90  1  0      
 87 89  1  0      
 87 88  1  0      
 89 92  1  0      
 89 95  1  0      
 90 95  1  0      
 90 94  1  0      
 92 94  1  0      
 82 95  1  0      
 85 87  1  0      
 85 93  1  0      
 88 93  1  0      
 91 93  1  0      
 88 92  1  0      
 91 94  1  0      
 96 97  2  0      
 97 98  1  0      
 98 99  2  0      
 99100  1  0      
100101  2  0      
101 96  1  0      
101102  1  0      
M  CHG  4  27   1  54   1  81   1  82  -3
M  END
